# Supplementary material
Source: MDPI journal article supplement (https://www.mdpi.com/2073-4344/12/1/4)
Supplement: s1 [file s1]

# Supporting Information

## Promotion effect of the Keggin structure on the sulfur and water resistance of Pt/CeTi catalysts for CO oxidation

Tong Zhang, Wenge Qiu\*, Hongtai Zhu, Xinlei Ding, Rui Wu, Hong He

### Additional figures and Data

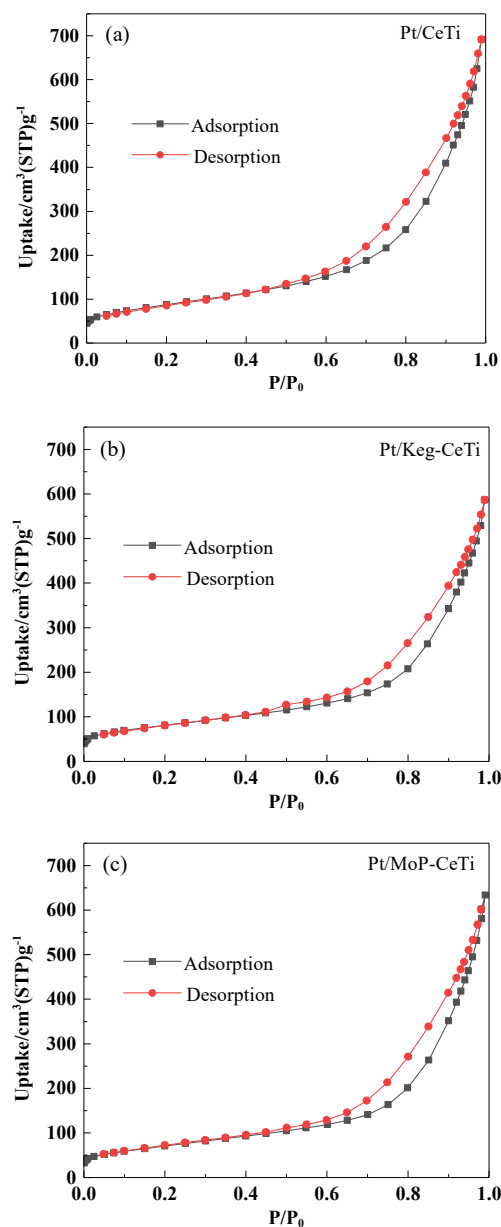

**Figure S1** Nitrogen adsorption/desorption isotherms of the Pt/CeTi (a), Pt/Keg-CeTi (b) and Pt/MoP-CeTi (c) catalysts.

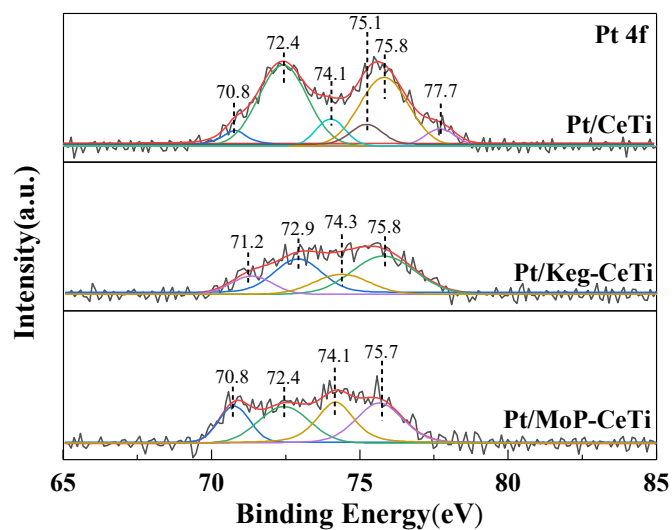

**Figure S2** XPS spectra of Pt 4f in the recovered Pt/CeTi, Pt/Keg-CeTi and Pt/MoP-CeTi catalysts. The Pt atomic ratios with different valence state were given in the following table:

| Sample      | Atomic ratio(%)                                               |                                                                  |                                                                  |
|-------------|---------------------------------------------------------------|------------------------------------------------------------------|------------------------------------------------------------------|
|             | $\text{Pt}^0/(\text{Pt}^0 + \text{Pt}^{2+} + \text{Pt}^{4+})$ | $\text{Pt}^{2+}/(\text{Pt}^0 + \text{Pt}^{2+} + \text{Pt}^{4+})$ | $\text{Pt}^{4+}/(\text{Pt}^0 + \text{Pt}^{2+} + \text{Pt}^{4+})$ |
| Pt/CeTi     | 13.9                                                          | 74.5                                                             | 11.6                                                             |
| Pt/Keg-CeTi | 31.3                                                          | 68.7                                                             | 0                                                                |
| Pt/MoP-CeTi | 43.4                                                          | 56.6                                                             | 0                                                                |

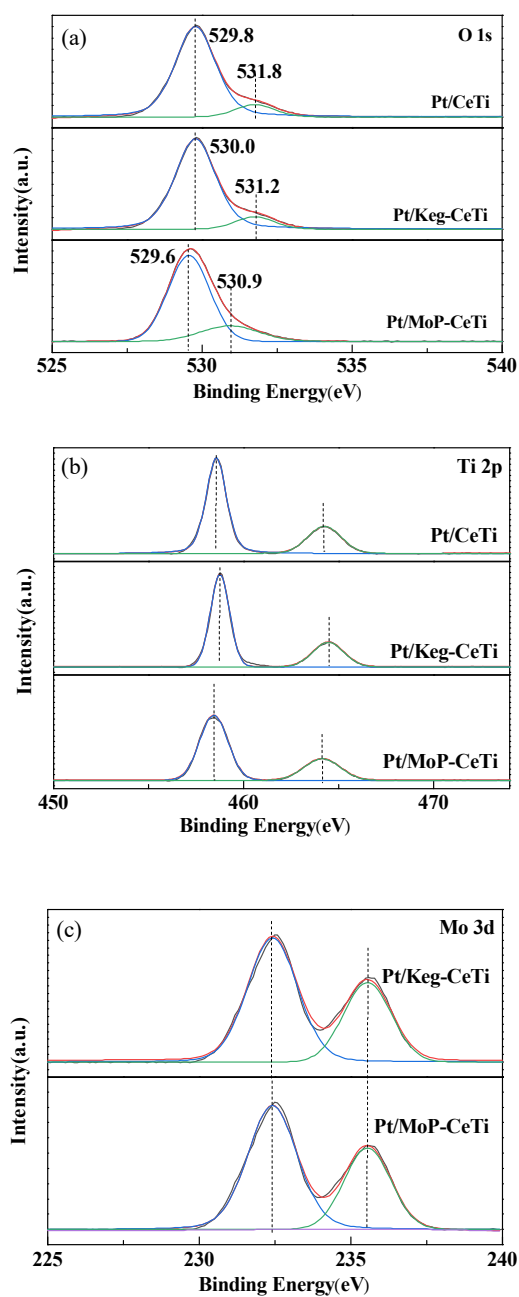

**Figure S3** Results of XPS of O 1s (a), Ti 2p (b) and Mo 3d (c) in the Pt/CeTi, Pt/Keg-CeTi and Pt/MoP-CeTi catalysts.

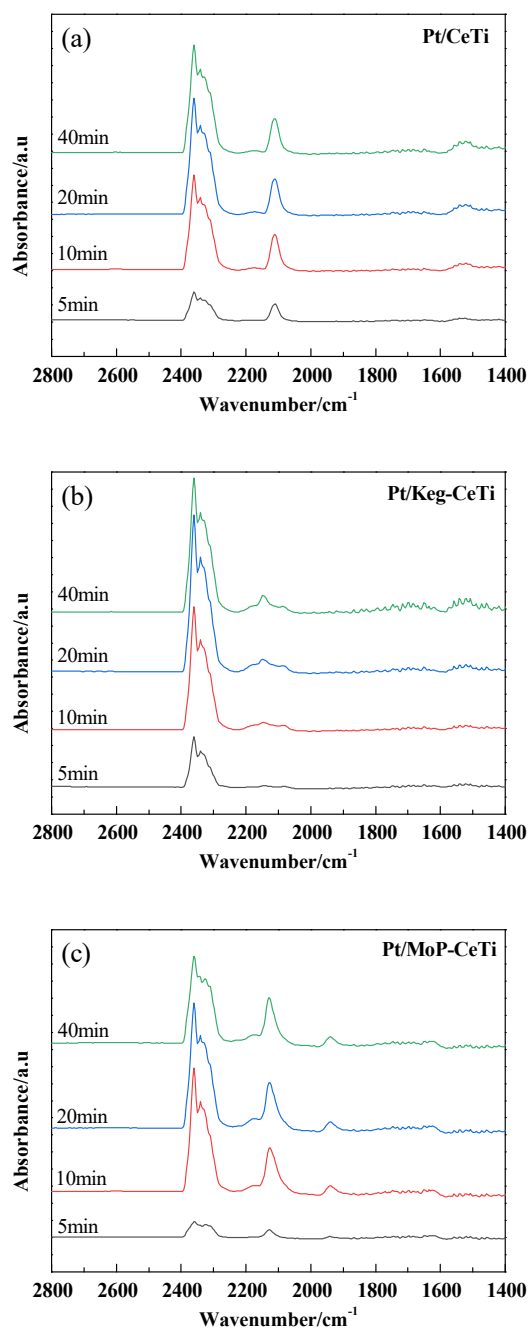

**Figure S4** Changes of FTIR spectra of Pt/CeTi (a), Pt/Keg-CeTi (b) and Pt/MoP-CeTi (c) with time under the following conditions:  $[\text{CO}] = 2\%$ ,  $[\text{O}_2] = 10 \text{ vol } \%$ , balance  $\text{N}_2$ , total flow rate =  $50 \text{ mL/min}$ ,  $T = 250 \text{ }^\circ\text{C}$ .

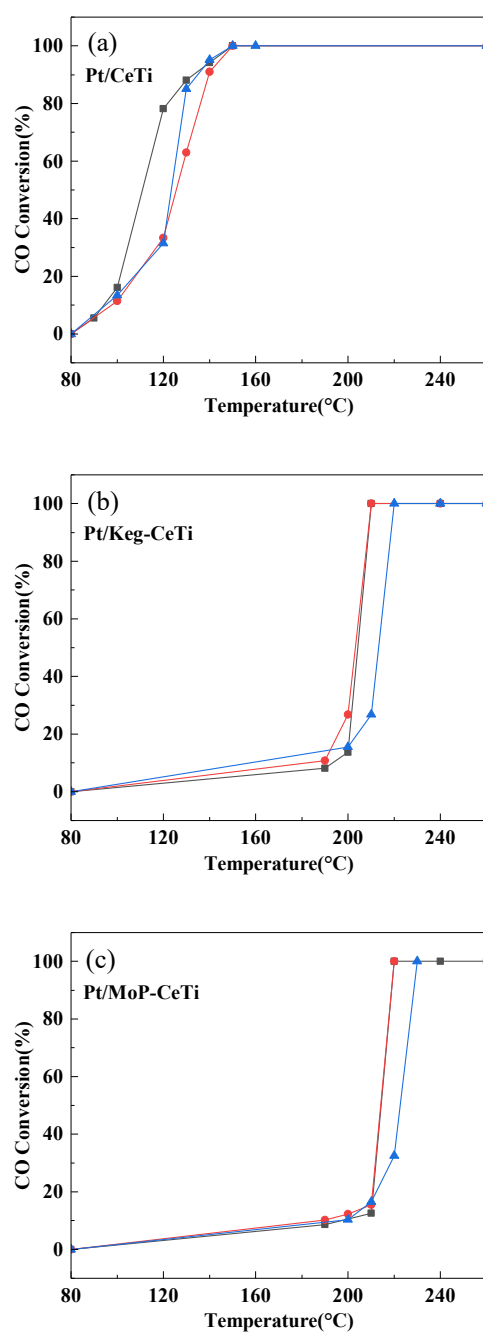

**Figure S5** CO conversions as a function of reaction temperature over the three parallel samples of Pt/CeTi (a), Pt/Keg-CeTi (b) and Pt/MoP-CeTi (c), respectively. Reaction conditions: [CO] = 1%, [O<sub>2</sub>] = 6 vol %, balance He, total flow rate = 667 ml/min, GHSV = 4 × 10<sup>5</sup> h<sup>-1</sup>.

**Table S1.** ICP results of Pt/CeTi, Pt/Keg-CeTi and Pt/MoP-CeTi after poisoned by SO<sub>2</sub> and the poisoned samples treated at 900 °C

| Sample      | Sulphur content (%)   |                      |
|-------------|-----------------------|----------------------|
|             | before heat treatment | after heat treatment |
| Pt/CeTi     | 0.68                  | 0.07                 |
| Pt/Keg-CeTi | 0.24                  | 0.05                 |
| Pt/MoP-CeTi | 0.36                  | 0.04                 |

**Table S2.** XPS binding energies (eV) of Pt/CeTi, Pt/Keg-CeTi and Pt/MoP-CeTi

| Sample              | Ce 3d <sub>3/2</sub> |        | Ce 3d <sub>5/2</sub> |        | Pt <sup>4+</sup> 4f |        | Pt <sup>2+</sup> 4f |        | O <sub>ads</sub> 1s |        | O <sub>latt</sub> 1s |        |
|---------------------|----------------------|--------|----------------------|--------|---------------------|--------|---------------------|--------|---------------------|--------|----------------------|--------|
|                     | BE                   | Area * | BE                   | Area * | BE                  | Area * | BE                  | Area * | BE                  | Area * | BE                   | Area * |
| Pt<br>/CeTi         | 900.1                | 12.3   | 881.6                | 22.2   | 74.8                | 14.8   | 73.0                | 37.1   | 531.8               | 10.1   | 529.8                | 89.9   |
|                     | 902.7                | 8.1    | 884.4                | 9.9    |                     |        |                     |        |                     |        |                      |        |
|                     | 906.4                | 9.8    | 887.5                | 13.1   | 78.3                | 8.5    | 76.4                | 39.5   |                     |        |                      |        |
|                     | 916.0                | 11.0   | 897.6                | 13.6   |                     |        |                     |        |                     |        |                      |        |
|                     | Pt/Keg<br>-CeTi      | 900.8  | 10.3                 | 882.2  | 14.5                | 74.7   | 14.7                | 73.1   | 35.2                | 531.2  | 22.2                 | 530.0  |
| 903.1               |                      | 11.0   | 884.4                | 20.0   |                     |        |                     |        |                     |        |                      |        |
| 907.5               |                      | 6.5    | 888.9                | 10.9   | 77.8                | 10.0   | 76.3                | 40.1   |                     |        |                      |        |
| 916.6               |                      | 11.6   | 898.2                | 15.1   |                     |        |                     |        |                     |        |                      |        |
| Pt<br>/MoP<br>-CeTi |                      | 900.1  | 13.8                 | 881.6  | 19.4                | 74.4   | 37.7                | 72.2   | 11.0                | 530.9  | 20.1                 | 529.6  |
|                     | 903.4                | 15.1   | 885.3                | 27.2   |                     |        |                     |        |                     |        |                      |        |
|                     | 906.5                | 6.6    | 888.7                | 4.8    | 78.0                | 18.1   | 76.3                | 33.2   |                     |        |                      |        |
|                     | 916.0                | 6.2    | 897.6                | 6.8    |                     |        |                     |        |                     |        |                      |        |

\* The area is percentage content (%)

**Table S3.** Relative area of NH<sub>3</sub>-TPD desorption peak of Pt/CeTi, Pt/Keg-CeTi and Pt/MoP-CeTi

| Sample      | area of low temperature<br>region (<200 °C) | area of high temperature<br>region (>200 °C) | Total  |
|-------------|---------------------------------------------|----------------------------------------------|--------|
| Pt/CeTi     | 775.6                                       | 1631.0                                       | 2406.6 |
| Pt/Keg-CeTi | 980.4                                       | 3042.2                                       | 4022.6 |
| Pt/MoP-CeTi | 716.9                                       | 824.8                                        | 1541.7 |

**Table S4.** H<sub>2</sub> consumption of Pt/CeTi, Pt/Keg-CeTi and Pt/MoP-CeTi calculated from the H<sub>2</sub>-TPR curves

| Sample      | H <sub>2</sub> consumption (μmol/g) |            |            | Total |
|-------------|-------------------------------------|------------|------------|-------|
|             | <100 °C                             | 100–550 °C | 550–800 °C |       |
| Pt/CeTi     | 4.0                                 | 83.4       | 97.7       | 185.1 |
| Pt/Keg-CeTi | 34.5                                | 60.3       | 55.4       | 150.2 |
| Pt/MoP-CeTi | 41.6                                | 77.2       | 40.8       | 159.6 |
